# Supplementary material for: Inhibition of Oxidative Stress and ALOX12 and NF-κB Pathways Contribute to the Protective Effect of Baicalein on Carbon Tetrachloride-Induced Acute Liver Injury
Source: MDPI journal article supplement (doi:10.3390/antiox10060976), 2021-06-18
Supplement: s1 [file s1]

## Supplemental data

### **Inhibition of oxidative stress and ALOX12 and NF-kB pathways contribute to the protective effect of baicalein on carbon tetrachloride-induced acute liver injury**

Chongshan Dai <sup>1,2\*</sup>, Hui Li<sup>3</sup>, Yang Wang <sup>1,2</sup>, Shusheng Tang <sup>1,2</sup>, Tony Velkov <sup>4\*</sup>, Jianzhong Shen<sup>1, 2</sup>

<sup>1</sup>College of Veterinary Medicine, China Agricultural University, No. 2 Yuanmingyuan West Road, Beijing 100193, P. R. China.

<sup>2</sup>Beijing Key Laboratory of Detection Technology for Animal-Derived Food Safety, College of Veterinary Medicine, China Agricultural University, Beijing 100193, P. R. China.

<sup>3</sup>University of Texas Southwestern Medical Center, Dallas, Texas, USA.

<sup>4</sup>Department of Pharmacology & Therapeutics, School of Biomedical Sciences, Faculty of Medicine, Dentistry and Health Sciences, The University of Melbourne, Parkville, Victoria, 3010, Australia.

\*Corresponding authors:

Chongshan Dai, E-mail: [daichongshan@cau.edu.cn](mailto:daichongshan@cau.edu.cn); OR Tony Velkov, [Tony.Velkov@unimelb.edu.au](mailto:Tony.Velkov@unimelb.edu.au)

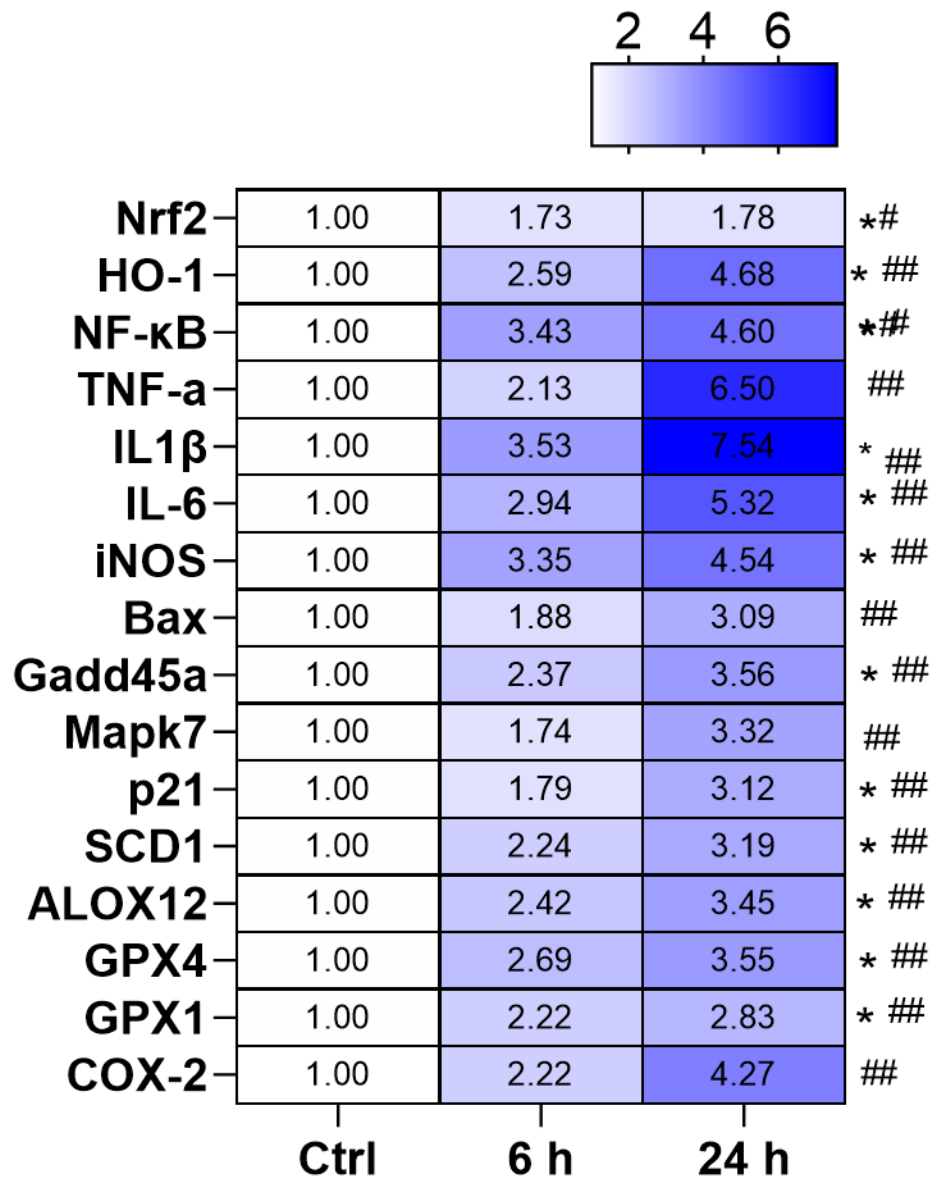

**Figure S1.** Gene expression involved apoptosis, inflammation and ferroptosis pathway in the liver tissues exposed with CCl<sub>4</sub>. Heat map of gene expression in the liver tissues of mice exposed to CCl<sub>4</sub> at 6 and 24 h (n = 4). 6 h vs ctrl, \* p < 0.05, \*\*p < 0.01; 24 h vs ctrl, # p < 0.05, ##p < 0.01. Ctrl, control.

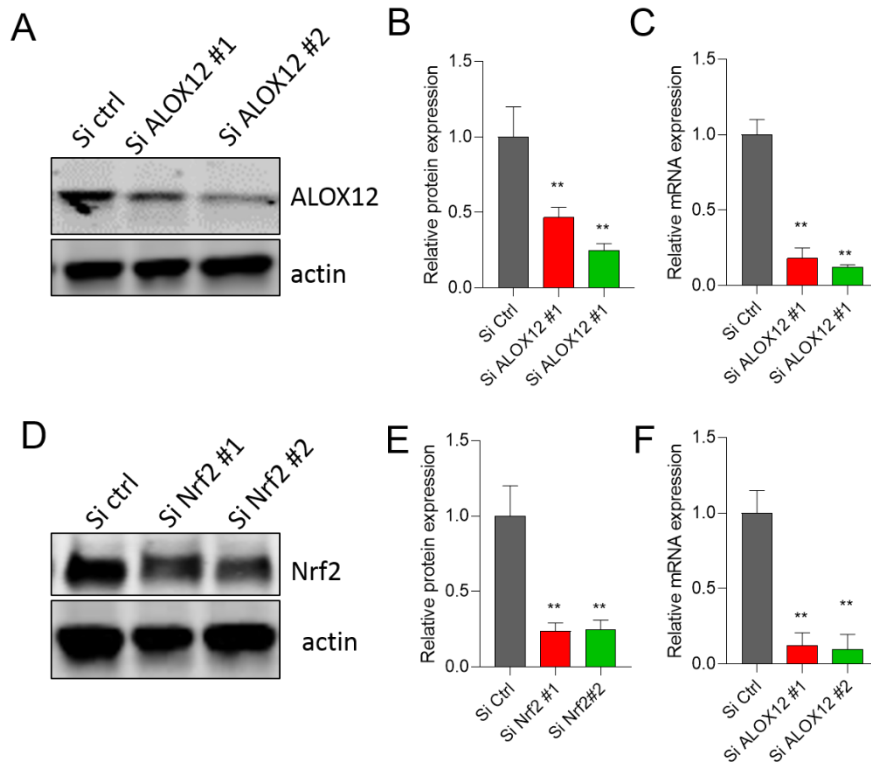

**Figure S2.** Gene and protein expression was detected in HepG2 cells with the knockdown of *ALOX12* and *Nrf2* genes. (A) Representative expression of ALOX12 protein by western blot after HepG2 cells were transfected with SiRNA#1 (SASI\_Hs02\_00303100) and SiRNA#2, (SASI\_Hs02\_00303101), respectively. (B) and (C) Levels of protein and mRNA in HepG2 cells after SiRNA transfection were determined. (D) Representative expression of Nrf2 protein by western blot after HepG2 were transfected with SiRNA#1 (SASI\_Hs01\_00182393) and SiRNA#2 (SASI\_Hs02\_00341015), respectively. The protein quantification and mRNA expression showed in (E) and (F), respectively. Data are showed as mean  $\pm$  SD. \* $p < 0.05$ , \*\* $p < 0.01$ , compared to the Si Ctrl group, respectively. Ctrl, control.

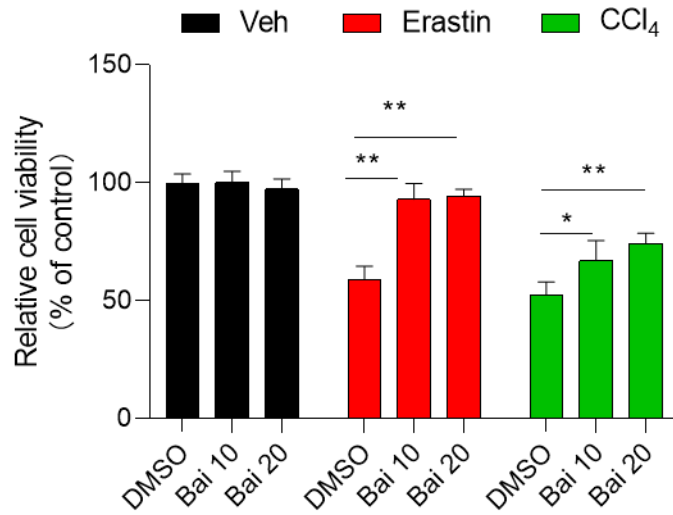

**Figure S3.** Effect of baicalein on erastin and CCl<sub>4</sub>-induced cell death in HepG2 cells. HepG2 cells were treated with baicalein at the doses of 10 or 20  $\mu$ M for 2 h, then cells were treated with 10  $\mu$ M erastin or 0.4% CCl<sub>4</sub> for additional 24 h. Cell viabilities were finally examined. Data are presented as mean  $\pm$  SD (n=5). \*p < 0.05, \*\*p < 0.01.

**A**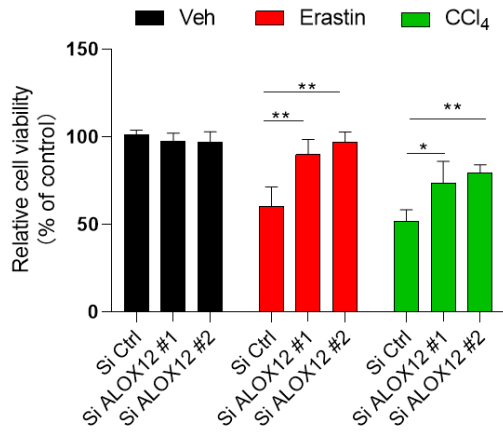**B**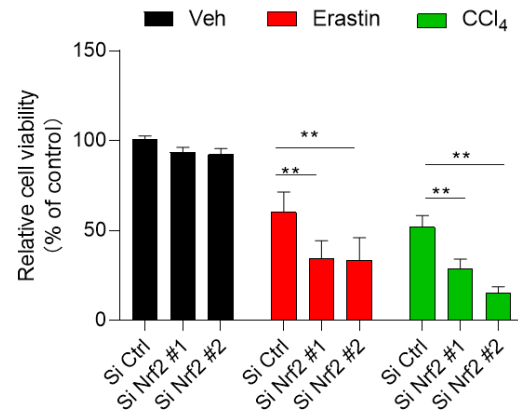

**Figure S4.** Effect of knockdown of ALOX12 and Nrf2 on CCl<sub>4</sub> and erastin-induced cell death in HepG2 cells. (A) Effects of knockdown of ALOX12 (A) or Nrf2 (B) by SiRNA on erastin (10  $\mu$ M) or CCl<sub>4</sub> (0.4%) treatment (for 24 h) -induced the loss of cell viabilities. All data are presented as mean  $\pm$  SD (n = 3). \*p < 0.05, \*\*p < 0.01.

**Table S1. Primers for qRT-PCR**

|                |       |                                     |
|----------------|-------|-------------------------------------|
| $\beta$ -Actin | Mouse | 5'-GCCCTGAGGCTCTTTTCCA-3'           |
|                |       | 5'-GTTGGCATAGAGGTCTTTACGGAT-3'      |
| Gadd45a        | Mouse | 5'-GCAGAGCAGAAGACCGAAAG-3'          |
|                |       | 5'-TAACAGAACGCACGGATGAG-3'          |
| Mapk7          | Mouse | 5'- TGTGACCAATGCCAAACGG-3'          |
|                |       | 5'-GCGGCTGTGAAGAGTGAATGA-3'         |
| Nrf2           | Mouse | 5'-CAC ATT CCC AAA CAA GAT GC-3'    |
|                |       | 5'-TCT TTT TCC AGC GAG GAG AT-3'    |
| HO-1           | Mouse | 5'-CGT GCT CGA ATG AAC ACT CT-3     |
|                |       | 5'-GGA AGC TGA GAG TGA GGA CC-3';   |
| NF- $\kappa$ B | Mouse | 5'-CAC TGT CTG CCT CTC TCG TCT-3'   |
|                |       | 5'-AAG GAT GTC TCC ACA CCA CTG-3';  |
| COX-2          | Mouse | 5'-CAA GCA GTG GCA AAG GCC TCC A-3' |
|                |       | 5'-GGC ACT TGC ATT GAT GGT GGC T-3  |
| Alox12         | Mouse | 5'-TCCCTCAACCTAGTGCGTTTG-3'         |
|                |       | 5'-GTTGCAGCTCCAGTTTCGC-3'           |
| TNF            | Mouse | 5'-AGCCGATGGGTTGTACCTTG-3'          |
|                |       | 5'-ATAGCAAATCGGCTGACGGT-3'          |
| IL1B           | Mouse | 5'-CCGTGGACCTTCCAGGATGA-3'          |
|                |       | 5'-GGGAACGTCACACACCAGCA-3'          |
| IL-6           | Mouse | 5'-AGGATACCACTCCCAACAGACCT-3'       |

|         |       |                                 |
|---------|-------|---------------------------------|
|         |       | 5'-CAAGTGCATCATCGTTGTTTCATAC-3' |
| iNOS    | Mouse | 5'-GGCAGCCTGTGAGACCTTTG-3'      |
|         |       | 5'-GCATTGGAAGTGAAGCGTTTC-3'     |
| Bax     | Mouse | 5'-AAACTGGTGCTCAAGGCCCT-3'      |
|         |       | 5'-AGCAGCCGCTCACGGAG-3'         |
| GPX4    | Mouse | 5'-TTCCCGTGTAACCAGTTCG-3'       |
|         |       | 5'-CGGCGAACTCTTTGATCTCT-3'      |
| GPX1    | Mouse | 5'-TCGGTTTCCCGTGCAATCAG-3'      |
|         |       | 5'-GTCGGACGTACTTGAGGGAA-3'      |
| SCD1    | Mouse | 5'-GCAAGCTCTACACCTGCCTCTT-3'    |
|         |       | 5'-CGTGCCTTGTAAGTTCTGTGGC-3'    |
| Alox12  | Human | 5'-CCTCGTTATGCTGAAGATGGAGC-3'   |
|         |       | 5'-ATTTCCGACCCAGGACTTTGCC-3'    |
| β-Actin | Human | 5'-CACCATTGGCAATGAGCGGTTC-3'    |
|         |       | 5'-AGGTCTTTGCGGATGTCCACGT-3'    |
| Nrf2    | Human | 5'-CACATCCAGTCAGAAACCAGTGG-3'   |
|         |       | 5'-GGAATGTCTGCGCCAAAAGCTG-3'    |
| HO-1    | Human | 5'-CCAGGCAGAGAATGCTGAGTTC-3'    |
|         |       | 5'-AAGACTGGGCTCTCCTTGTTGC-3'    |
